# Supplementary material for: Selection and Spread of Artemisinin-Resistant Alleles in Thailand Prior to the Global Artemisinin Resistance Containment Campaign
Source: PubMed Central journal article supplement (PMC4383523; doi:10.1371/journal.ppat.1004789), 2015-04-02
Supplement: ppat.1004789.s003.pdf [file ppat.1004789.s003.pdf]

Table 1

| A total of 25 MS markers were tested flanking the K13 gene. In <b>bold</b> are MS markers (8.6kb and 31.5kb) that were informative and separated the C580Y haplotypes by geography. In green are MS markers = successful amplification. <i>Please refer to Table S1 for final raw data.</i> |         |                                                                                                                                   |
|---------------------------------------------------------------------------------------------------------------------------------------------------------------------------------------------------------------------------------------------------------------------------------------------|---------|-----------------------------------------------------------------------------------------------------------------------------------|
| Number                                                                                                                                                                                                                                                                                      | Locus   | Primer seq (5' to 3')                                                                                                             |
| 1                                                                                                                                                                                                                                                                                           | 0.1kb   | ATGAAGAAATTTTAAATGTTC                                                                                                             |
|                                                                                                                                                                                                                                                                                             |         | ATTTATAGCTAATAAGTAATATC                                                                                                           |
| 2                                                                                                                                                                                                                                                                                           | 0.5kb   | TATGATAATATAAATTCTCATG                                                                                                            |
|                                                                                                                                                                                                                                                                                             |         | TATTAATAGAATTGTTCAAACAT                                                                                                           |
| 3                                                                                                                                                                                                                                                                                           | 0.1kb   | CTTTAATATTTATTTTCATGCAC                                                                                                           |
|                                                                                                                                                                                                                                                                                             |         | GAACAATTCTATTAATATTTTAAG                                                                                                          |
| 4                                                                                                                                                                                                                                                                                           | 3.4kb   | TCTACAGCGGTAAGATGAATAG                                                                                                            |
|                                                                                                                                                                                                                                                                                             |         | TCCTTGGCATGTCCCGGCTGC                                                                                                             |
| 5                                                                                                                                                                                                                                                                                           | 8.6kb   | <b>ACGGGTTTCTGTACGCCTCAC</b>                                                                                                      |
|                                                                                                                                                                                                                                                                                             |         | <b>CTAAATTAGTGGCTTCTTCAT</b>                                                                                                      |
| 6                                                                                                                                                                                                                                                                                           | 15.1kb  | CTTACTTCTAGGAGAATCCT                                                                                                              |
|                                                                                                                                                                                                                                                                                             |         | GATAACTACTCATCTCCACA                                                                                                              |
| 7                                                                                                                                                                                                                                                                                           | 20.0kb  | CTAAACCAAATGAGATAAGG                                                                                                              |
|                                                                                                                                                                                                                                                                                             |         | GTTATACTATTATACATATGTATAGG                                                                                                        |
| 8                                                                                                                                                                                                                                                                                           | 21.0kb  | TCCTATACATATGTATAATAGTATAAC                                                                                                       |
|                                                                                                                                                                                                                                                                                             |         | AAGGATTCTTCGTACCTATG                                                                                                              |
| 9                                                                                                                                                                                                                                                                                           | 31.0kb  | GAAGATGTAGATATTACTTGTA                                                                                                            |
|                                                                                                                                                                                                                                                                                             |         | TATAAGATTCGTTATTACATG                                                                                                             |
| 10                                                                                                                                                                                                                                                                                          | 31.5kb  | <b>GTACAAATGAACCTCTTCC</b>                                                                                                        |
|                                                                                                                                                                                                                                                                                             |         | <b>AATAATTCACCATGTCATGC</b>                                                                                                       |
| 11                                                                                                                                                                                                                                                                                          | 42.0kb  | TGTTAAGCATCCATTCTCTC                                                                                                              |
|                                                                                                                                                                                                                                                                                             |         | CATCTTAAATGTACAAATATGTCC                                                                                                          |
| 12                                                                                                                                                                                                                                                                                          | 43.0kb  | CATCTTAAATGTACAAATATGTCC                                                                                                          |
|                                                                                                                                                                                                                                                                                             |         | TGTTAAGCATCCATTCTCTC                                                                                                              |
| 13*                                                                                                                                                                                                                                                                                         | 72.3kb  | TGTTAAGCATCCATTCTCTC                                                                                                              |
|                                                                                                                                                                                                                                                                                             |         | TGTTAAGCATCCATTCTCTC                                                                                                              |
| 14                                                                                                                                                                                                                                                                                          | -0.1kb  | ACAAGGCGTAAATATTCGTGT                                                                                                             |
|                                                                                                                                                                                                                                                                                             |         | GATCCCTATCATACGTCATAG                                                                                                             |
| 15                                                                                                                                                                                                                                                                                          | -0.15kb | GATCCCTATCATACGTCATAG                                                                                                             |
|                                                                                                                                                                                                                                                                                             |         | ACAAGGCGTAAATATTCGTG                                                                                                              |
| 16                                                                                                                                                                                                                                                                                          | -0.4kb  | CGAAAAATAATTTATTATTCATAC                                                                                                          |
|                                                                                                                                                                                                                                                                                             |         | TATATATACATTTACATATGG                                                                                                             |
| 17                                                                                                                                                                                                                                                                                          | -2.5kb  | TGAAAACATATACATAGAATG                                                                                                             |
|                                                                                                                                                                                                                                                                                             |         | TTCACAAATATATCACTGC                                                                                                               |
| 18                                                                                                                                                                                                                                                                                          | -2.0kb  | GCAGTGATATATTTGTGAACAG                                                                                                            |
|                                                                                                                                                                                                                                                                                             |         | TCCTTCATATTACATAAAGTCC                                                                                                            |
| 19                                                                                                                                                                                                                                                                                          | -3.0kb  | GTTAATTATTGGGCTTACATTC                                                                                                            |
|                                                                                                                                                                                                                                                                                             |         | GTCAATATTTATAATTTAGATGAG                                                                                                          |
| 20                                                                                                                                                                                                                                                                                          | -3.74kb | GTCAATATTTATAATTTAGATGAG                                                                                                          |
|                                                                                                                                                                                                                                                                                             |         | GTCAATATTTATAATTTAGATGAG                                                                                                          |
| 21                                                                                                                                                                                                                                                                                          | -6.36kb | AATTAGACAGGACTTGTTAATG                                                                                                            |
|                                                                                                                                                                                                                                                                                             |         | GGATATGTTATCCAAAATGCA                                                                                                             |
| 23*                                                                                                                                                                                                                                                                                         | -31.9kb | AATCAATCATGGAAATTATG                                                                                                              |
|                                                                                                                                                                                                                                                                                             |         | TTGTTCAATTAAGGGTATTT                                                                                                              |
| 24                                                                                                                                                                                                                                                                                          | -36.0kb | ACATATTATTATGTGTGGATGTC                                                                                                           |
|                                                                                                                                                                                                                                                                                             |         | ATAACAAATCAATAAATGAACTC                                                                                                           |
| 25                                                                                                                                                                                                                                                                                          | -40.0kb | TTAACGAGAATCGCTTCAT                                                                                                               |
|                                                                                                                                                                                                                                                                                             |         | TAATTATCACTTAATTATATTG                                                                                                            |
| 26                                                                                                                                                                                                                                                                                          | -45.5kb | AGCACAATAAAGTTGGC                                                                                                                 |
|                                                                                                                                                                                                                                                                                             |         | TCTACCAGTATTAATATTTGAG                                                                                                            |
| 27                                                                                                                                                                                                                                                                                          | -50.0kb | ATGACGAGGATAACCATG                                                                                                                |
|                                                                                                                                                                                                                                                                                             |         | AATATGTACGATCATTACAGT                                                                                                             |
| 28                                                                                                                                                                                                                                                                                          | -56.0kb | TCCTTCTATTTGTGTGAGTACAG                                                                                                           |
|                                                                                                                                                                                                                                                                                             |         | TATTGTAATGCATGCACTG                                                                                                               |
|                                                                                                                                                                                                                                                                                             |         | *Cheeseman, I.H., et al., A major genome region underlying artemisinin resistance in malaria. Science, p. 79-82. 2012. 336(6077): |
